# Supplementary material for: Traumatic Spinal Injury in Children; Time to Revise Pre-Hospital and Diagnostic Protocols?
Source: MDPI journal article supplement (doi:10.3390/jcm13082372), 2024-04-18
Supplement: s1 [file s1]

## Supplementary Materials

| Age | Level                      | Symptoms                                                                        | Interventions             | Recovery                         |
|-----|----------------------------|---------------------------------------------------------------------------------|---------------------------|----------------------------------|
| 15  | Cervical                   | Partial sensory both hands                                                      | None                      | Full recovery                    |
| 13  | Cervical                   | Partial sensory and motor deficit 1 arm                                         | Surgery and collar        | Full recovery                    |
| 16  | Cervical                   | Partial sensory and motor deficit both arms                                     | Surgical                  | Full recovery                    |
| 15  | Cervical                   | Partial sensory and motor deficit 1 arm                                         | HALO vest, later surgical | Full recovery                    |
| 16  | Lumbar                     | Partial sensory deficit legs, bladder dysfunction                               | Surgical                  | Partial recovery                 |
| 16  | Thoracic                   | Complete motor and sensory                                                      | Surgical                  | No recovery                      |
| 17  | Cervical, thoracic, lumbar | Partial sensory and motor deficit                                               | Surgical                  | Partial recovery                 |
| 16  | Cervical                   | Complete sensory and motor deficit legs, partial sensory and motor deficit arms | Surgical                  | Partial recovery upper extremity |
| 15  | Cervical                   | Complete sensory and motor deficit                                              | None                      | Full recovery                    |
| 16  | Lumbar                     | Complete motor, partial sensory                                                 | Surgical                  | Partial recovery                 |
| 13  | Cervical                   | Partial motor and sensory unilateral arm/leg                                    | HALO vest                 | Partial recovery                 |
| 16  | Lumbar                     | Partial motor and sensory 1 arm                                                 | None                      | Partial recovery                 |
| 13  | Sacral                     | Partial sensory                                                                 | Surgical                  | Partial recovery                 |
| 13  | Cervical                   | Partial sensory and motor 1 arm                                                 | Vista collar              | Full recovery                    |
| 17  | Thoracic                   | Complete sensory and motor deficit                                              | Surgical                  | No recovery                      |
| 8   | Cervical                   | Partial sensory and motory deficit                                              | Surgical                  | Full recovery                    |
| 14  | Cervical                   | Complete sensory and motor deficit                                              | Surgical                  | No recovery                      |
| 5   | Thoracic                   | Complete sensory and motor deficit                                              | Surgical                  | No recovery                      |
| 9   | Cervical, thoracic         | Complete sensory and motor deficit                                              | Surgical and HALO vest    | Partial                          |
| 16  | Cervical                   | Clinically undetermined due to severe traumatic brain injury                    | Cervical collar           | Undetermined                     |
| 15  | Thoracic                   | Partial sensory and motor deficit 1 leg                                         | Surgical                  | Partial recovery                 |
| 15  | Cervical                   | Partial sensory and motor deficit all limbs                                     | Surgical                  | Partial recovery                 |
| 10  | Cervical, thoracic         | Partial sensory legs                                                            | None                      | Full recovery                    |
| 14  | Sacral                     | Partial sensory                                                                 | None                      | Full recovery                    |
| 17  | Cervical                   | Partial sensory and motor arms                                                  | Surgical                  | Partial                          |
| 16  | Lumbar                     | Partial sensory legs                                                            | Surgical                  | Full recovery                    |
